# Supplementary material for: The Edible Insect Gryllus bimaculatus Protects against Gut-Derived Inflammatory Responses and Liver Damage in Mice after Acute Alcohol Exposure
Source: PubMed Central journal article supplement (PMC6521266; doi:10.3390/nu11040857), 2019-04-16
Supplement: nutrients-11-00857-s001.pdf [file nutrients-11-00857-s001.pdf]

## Supporting Information

**Table S1. Antibodies used for western blotting and immunofluorescent staining.**

| Primary antibody                | Clone        | Company        | Catalog No. | Dilution                  |
|---------------------------------|--------------|----------------|-------------|---------------------------|
| <b>FAS</b>                      | Polyclonal   | Thermo         | Pa1-32355   | 1:1000 (WB)               |
| <b>ACC</b>                      | Polyclonal   | Thermo         | Pa5-17564   | 1:1000 (WB)               |
| <b>SREBP-1</b>                  | Polyclonal   | Thermo         | Pa1-46142   | 1:500 (WB)<br>1:200 (IF)  |
| <b>c-Caspase3</b>               | Polyclonal   | Cell signaling | #9662       | 1:1000 (WB)<br>1:300 (IF) |
| <b>c-PARP</b>                   | E51          | ABcam          | ab32064     | 1:2000 (WB)               |
| <b>Lamin B</b>                  | C-20         | Santa Cruz     | Sc-6216     | 1:2000 (WB)               |
| <b>Bcl-2</b>                    | 100/D5       | ABcam          | ab692       | 1:500 (WB)                |
| <b>p53</b>                      | Pab 1801     | Santa Cruz     | Sc-98       | 1:1000 (WB)               |
| <b>8-OH-dG</b>                  | 15A3         | ABcam          | Ab62623     | 1:200 (IF)                |
| <b>MDA</b>                      | 11E3         | NOVUS          | NBP2-59367  | 1:50 (IF)                 |
| <b>IL-1<math>\beta</math></b>   | Polyclonal   | ABcam          | Ab9722      | 1:50 (IF)                 |
| <b>F4/80</b>                    | C-7          | Santa Cruz     | Sc-377009   | 1:300 (IF)                |
| <b>LPS</b>                      | WN1 222-5    | Hycult Biotech | HM6011      | 1:100 (IF)                |
| <b>p-JNK</b>                    | EPR5693      | ABcam          | Ab124956    | 1:1000 (WB)               |
| <b>JNK</b>                      | EPR16797-211 | ABcam          | Ab179461    | 1:1000 (WB)               |
| <b>p-p38</b>                    | Polyclonal   | ABcam          | Ab47363     | 1:1000 (WB)               |
| <b>p38</b>                      | M138         | ABcam          | Ab31828     | 1:1000 (WB)               |
| <b>TLR4</b>                     | Polyclonal   | ABcam          | Ab13867     | 1:1000 (WB)               |
| <b>p-MLCK</b>                   | Polyclonal   | ABcam          | Ab200809    | 1:1000 (WB)               |
| <b>p-ROCK</b>                   | Polyclonal   | ABcam          | Ab203273    | 1:1000 (WB)               |
| <b>p-srcFK</b>                  | D49G4        | Cell signaling | #6943       | 1:1000 (WB)               |
| <b><math>\beta</math>-actin</b> | C4           | Santa Cruz     | Sc-47778    | 1:2000 (WB)               |
